# Supplementary material for: Fabrication of Au@CdS/RGO/TiO2 heterostructure for photoelectrochemical hydrogen production
Source: Royal Society of Chemistry journal article supplement (doi:10.1039/c5nj03307a), 2015-12-22
Supplement: c5nj03307a1.pdf [file c5nj03307a1.pdf]

## Supporting Information

### Fabrication of Au@CdS/RGO/TiO<sub>2</sub> heterostructure for photoelectrochemical hydrogen production

Chunfa Li,<sup>†</sup> Weiqiang Fan,<sup>†</sup> Huachang Lu, Yilin Ge, Hongye Bai\* and Weidong Shi\*

School of Chemistry and Chemical Engineering, Jiangsu University, Zhenjiang,  
212013, P. R. China

These authors contributed to the work equally and should be regarded as co-first authors

E-mail: fwq4993329@yahoo.com

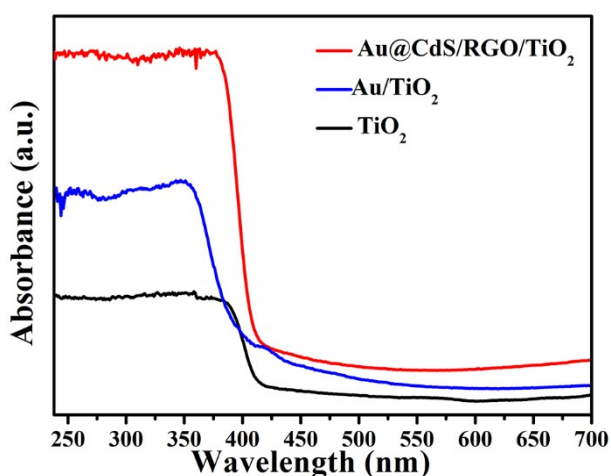

**Fig. S1** UV-vis diffuse reflectance spectra (DRS) of synthesized TiO<sub>2</sub>, Au/TiO<sub>2</sub>, and Au@/CdS/RGO/TiO<sub>2</sub>.

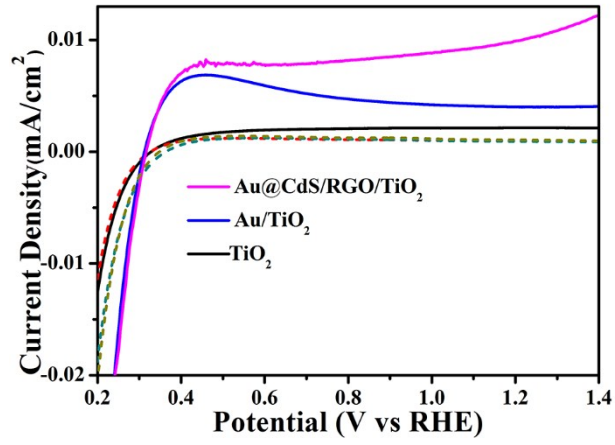

**Fig. S2** I–V characteristic curves of TiO<sub>2</sub>, Au/TiO<sub>2</sub>, Au@CdS/RGO/TiO<sub>2</sub> under dark and visible light irradiation.
